# Supplementary material for: DNA methylation landscape of fat deposits and fatty acid composition in obese and lean pigs
Source: PubMed Central journal article supplement (PMC5056348; doi:10.1038/srep35063), 2016-10-10
Supplement: srep35063-s2.pdf [file srep35063-s2.pdf]

# Supplementary Information

## DNA methylation landscape of fat deposit and fatty acid composition variation in obese and lean pigs

Shunhua Zhang, Linyuan Shen, Yudong Xia, Qiong Yang, Xuewei Li, Guoqing Tang, Yanzhi Jiang, Jinyong Wang, Mingzhou Li & Li Zhu

### On-line Supplementary Data

#### Supplementary Figures:

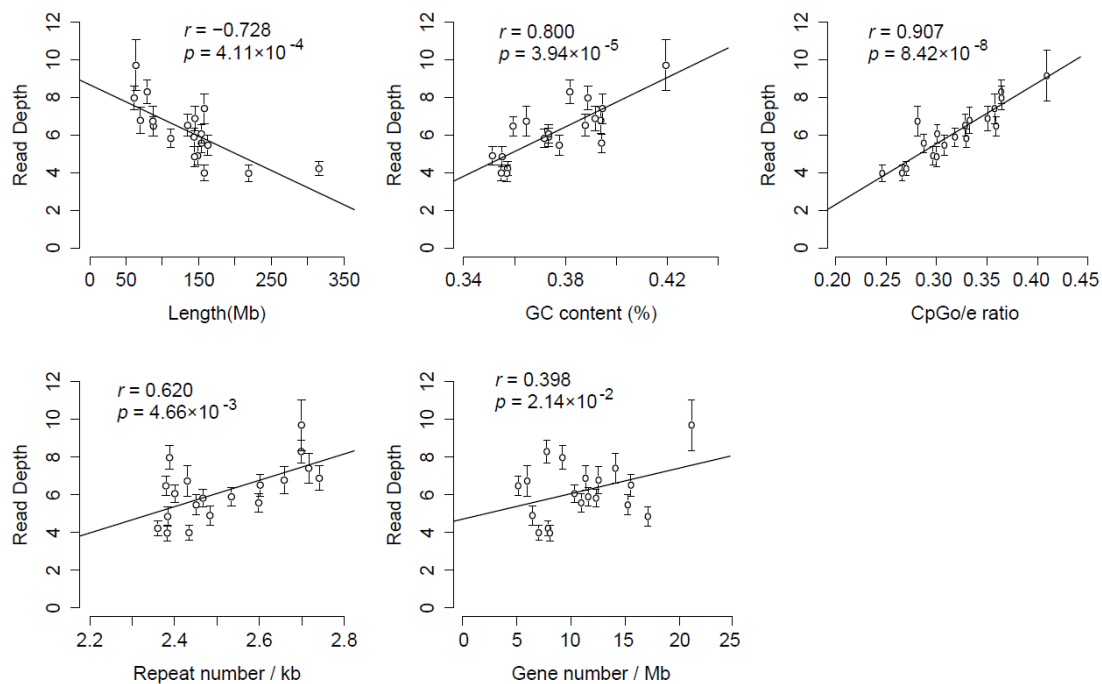

Supplementary Figure S1. Pearson's correlation between DNA methylation levels and chromosomal features.

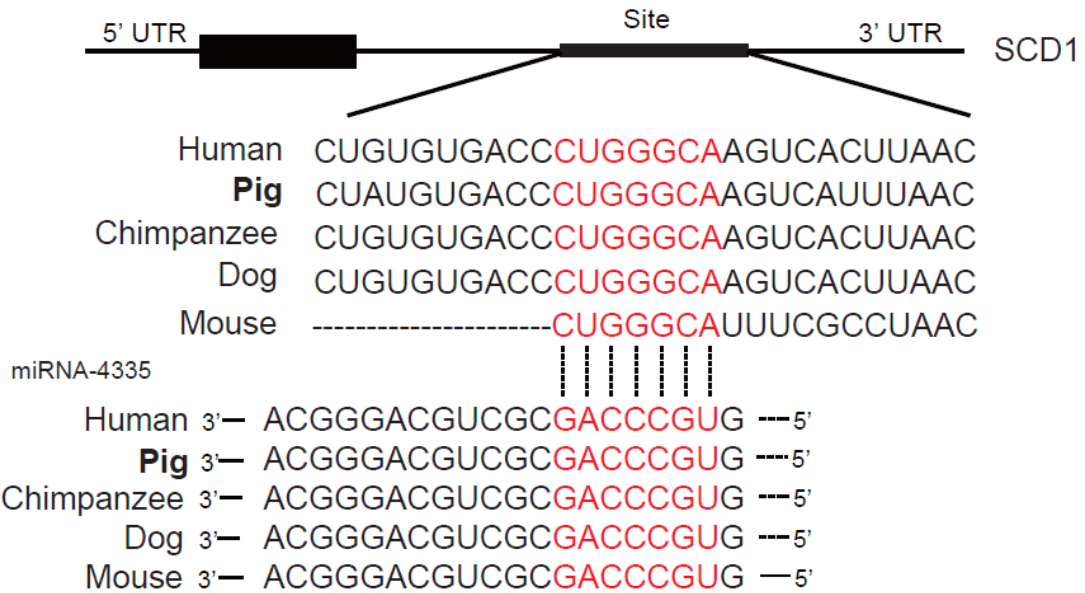

**Supplementary Figure S2. miR-4335 targets the 3'-UTR of SCD1.** Sequence alignment of miR-4335 with 3'-UTR of human, pig, chimpanzee, dog and mouse SCD1 mRNA. Binding site and seed region of miR-4335 are indicated in red.

**Supplementary Table S1: Information on primers used to perform Q-PCR and BSP.**

| Gene symbol    | Forword primer           | Reverse primer                       |
|----------------|--------------------------|--------------------------------------|
| C/EBP $\alpha$ | GGCGGCATCTGCGAACACGA     | GCTGAAACAGGTCGGCCAGGAA               |
| C/EBP $\beta$  | CCTGTCCACATCCTCGTCGTCC   | CGCTGTGCTTATCCACGGTCTTCT             |
| SCD1           | TGAGGGCTTCCACAACACTAC    | TGGCAGCCTTGGATACTT                   |
| DNMT1          | TGGCGGGACCTACCAAACA      | ACTTCCACGCAGGAGCAGA                  |
| DNMT3a         | AAGAATGCCACCAAATCAGCC    | AGAACTTGCCGTCTCCGAACCA               |
| DNMT3b         | AGGTCTCCAGCCTCCTAAGTT    | GTGTCTGAGCCATCTCCATCC                |
| miR-4335       | GUGCCCAGCGCUGCAGGGCA     | Uni-miR qPCR Primer, included in kit |
| miR-378        | ACUGGACUUGGAGUCAGAAGGC   | Uni-miR qPCR Primer, included in kit |
| BSP-4335       | GAGAGAGAGGTTTTAGATTGATGG | CCACTTCCTACATACAAAAAATC              |
| BSP-378        | TAATTTGGGAAATGTAATTGAGAG | ACCTCTCTCCCCAACTATAAAATA             |
| U6 snRNA*      | TTATGGGTCCTAGCCTGAC      | CACTATTGCGGGTCTGC                    |
| ACTB*          | TCTGGCACCACACCTTCT       | TGATCTGGGTCATCTTCTCAC                |
| TBP*           | GATGGACGTTTCGGTTTAGG     | AGCAGCACAGTACGAGCAA                  |
| TOP2B*         | AACTGGATGATGCTAATGATGCT  | TGGAAAACTCCGTATCTGTCTC               |

\* denotes the endogenous control genes. ACTB, TBP and TOP2B were simultaneously used as internal gene for mRNA normalization, but U6 was used as endogenous controls for microRNA. BSP-4335 and BSP-378 primer was designed for bisulfite sequencing PCR.

**Supplementary Table S2: The fatty acid composition of LBF and RBF**

| <b>Items</b>    | <b>LBF</b> | <b>RBF</b> | <b>P value</b> |
|-----------------|------------|------------|----------------|
| <b>C10:0</b>    | 0.04       | 0.04       | NS             |
| <b>C12:0</b>    | 0.05       | 0.06       | NS             |
| <b>C14:0</b>    | 1.00       | 1.34       | **             |
| <b>C16:0</b>    | 22.31      | 28.11      | **             |
| <b>C16:1</b>    | 1.74       | 1.63       | NS             |
| <b>C17:0</b>    | 0.36       | 0.20       | **             |
| <b>C17:1</b>    | 0.25       | 0.12       | **             |
| <b>C18:0</b>    | 13.30      | 18.26      | **             |
| <b>C18:2n-6</b> | 16.04      | 6.79       | **             |
| <b>C18:3n-3</b> | 0.76       | 1.24       | **             |
| <b>C18:3n-6</b> | 0.04       | 0.01       | **             |
| <b>C18:n-9</b>  | 41.38      | 40.24      | NS             |
| <b>C20:0</b>    | 0.34       | 0.40       | *              |
| <b>C20:2</b>    | 0.80       | 0.54       | **             |
| <b>C20:3n-3</b> | 1.37       | 0.81       | **             |
| <b>C20-1</b>    | 0.15       | 0.13       | NS             |
| <b>C22n-9</b>   | 0.02       | 0.02       | NS             |
| <b>DHA</b>      | 0.05       | 0.03       | *              |
| <b>EPA</b>      | 0.02       | 0.02       | NS             |
| <b>SFA</b>      | 37.39      | 48.42      | **             |
| <b>MUFA</b>     | 43.54      | 42.15      | NS             |
| <b>PUFA</b>     | 19.07      | 9.43       | **             |

DHA: Docosahexaenoic acid (22:6 n-3); EPA: Eicosapentaenoic acid (20:5 n-3); SFA, MUFA and PUFA are saturated, monounsaturated, and polyunsaturated fatty acids, respectively. Student's paired t-test (n = 9). \*\* $P < 0.01$ , \* $P < 0.05$ , NS: no significant difference ( $P > 0.05$ ).

**Supplementary Table S3: Summary of MeDIP-seq data production.**

| Tissue symbol | Biological replicate | Number of raw reads | Raw reads (Gb) | Number of clean reads | Clean reads (Gb) | Number of aligned reads | % aligned reads | Number of unique reads | % of unique reads |
|---------------|----------------------|---------------------|----------------|-----------------------|------------------|-------------------------|-----------------|------------------------|-------------------|
| <b>LBF</b>    | <b>1</b>             | 143,011,442         | 7.01           | 137,770,430           | 6.89             | 122,064,346             | 88.60%          | 93,211,480             | 76.36%            |
|               | <b>2</b>             | 131,080,312         | 6.42           | 124,543,412           | 6.23             | 111,321,020             | 89.38%          | 85,807,761             | 77.08%            |
|               | <b>3</b>             | 142,136,092         | 6.96           | 132,197,744           | 6.61             | 118,842,650             | 89.90%          | 93,061,223             | 78.31%            |
| <b>RBF</b>    | <b>1</b>             | 114,984,412         | 5.63           | 110,322,514           | 5.52             | 95,528,268              | 86.59%          | 71,905,416             | 75.27%            |
|               | <b>2</b>             | 110,543,488         | 5.42           | 106,464,046           | 5.32             | 94,274,142              | 88.55%          | 70,451,004             | 74.73%            |
|               | <b>3</b>             | 126,839,390         | 6.22           | 121,115,662           | 6.06             | 109,004,233             | 90.00%          | 84,795,274             | 77.79%            |
| <b>Total</b>  |                      | <b>781,057,914</b>  | <b>38.27</b>   | <b>732,413,808</b>    | <b>36.63</b>     | <b>651034659</b>        | <b>88.89%</b>   | <b>499232158</b>       | <b>76.68%</b>     |

The low-quality reads were filtered from the raw reads and clean reads were used in further analysis. “% aligned” is percent of clean reads aligned on the pig reference genome (version 10.2). “% unique” is percent of reads uniquely aligned over all the aligned reads. The reads with same mapping locations in each sample were taken as potentially duplicated clones created by PCR amplification during sequencing library construction, and hence were removed in the analysis.
